# Supplementary material for: 1,5-Anhydro-D-fructose Protects against Rotenone-Induced Neuronal Damage In Vitro through Mitochondrial Biogenesis
Source: MDPI journal article supplement (doi:10.3390/ijms22189941), 2021-09-14
Supplement: s1 [file s1]

## Supplementary Materials

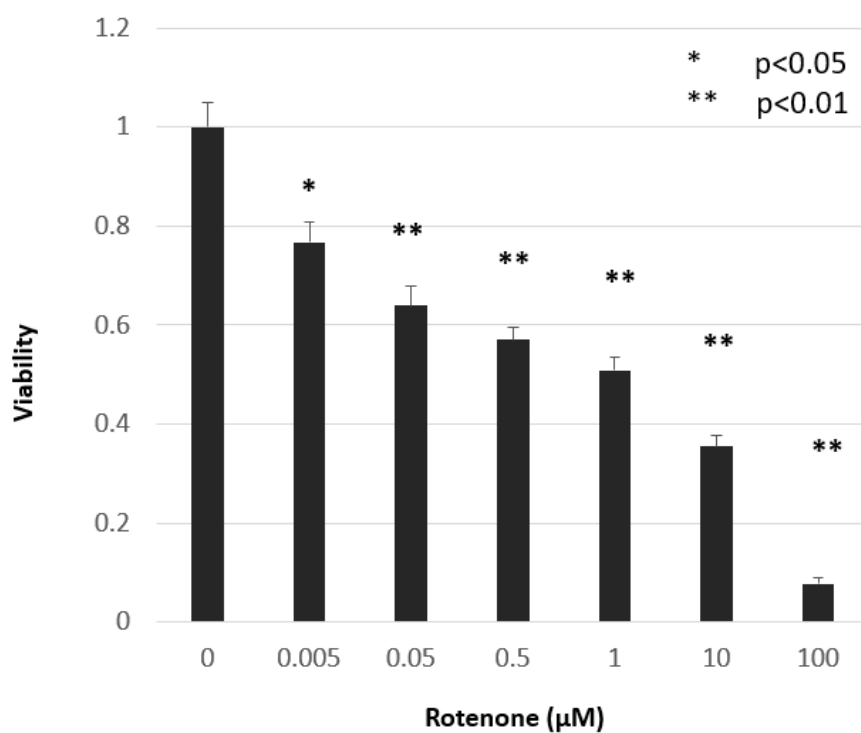

**Supplementary Figure S1.** Rotenone-induced cytotoxicity in cultured PC12 cells. Cells were incubated with control solvent (dimethyl sulfoxide) or rotenone for 24 hours; viable cells were then counted to evaluate the cytotoxic effects of rotenone in this cell line (one-way analysis of variance). Rotenone was cytotoxic in a dose-dependent manner. All data are expressed as the mean  $\pm$  standard error of the mean. \* $p < 0.05$ , \*\* $p < 0.01$ .

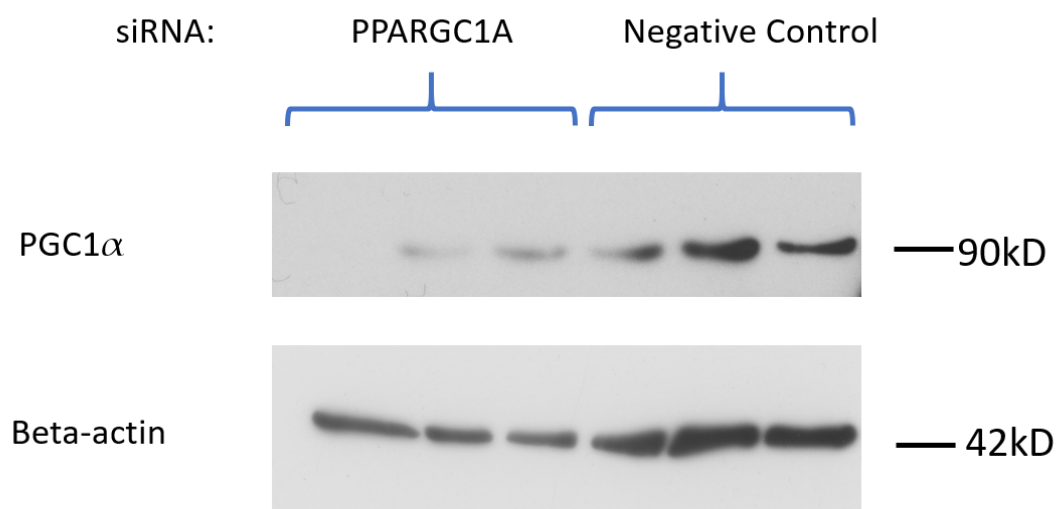

**Supplementary Figure S2.** PGC-1 $\alpha$  protein levels were assessed by immunoblotting. PGC-1 $\alpha$  protein was reduced by transfection with *PPARGC1A* siRNA, which silences PGC-1 $\alpha$  expression. PGC-1 $\alpha$ , peroxisome proliferator-activated receptor- $\gamma$  coactivator 1 $\alpha$ ; siRNA, small interfering RNA.

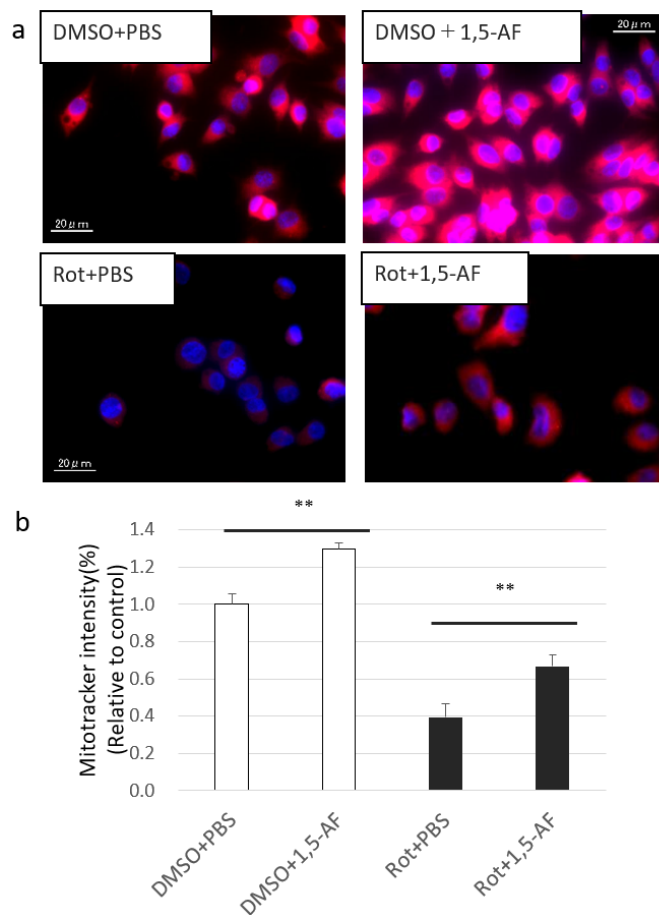

**Supplementary Figure S3.** Effects of 1,5-AF treatment on mitochondrial quantity and quality in cultured PC12 cells. (a) Representative confocal images of MitoTracker staining (magnification: 100×; scale bar: 20  $\mu\text{m}$ ). (b) Quantification of the effects of 1,5-AF treatment on MitoTracker intensity, from confocal images of MitoTracker-stained cells. All data are expressed as the mean  $\pm$  standard error of the mean. \* $p < 0.05$ , \*\* $p < 0.01$ . 1,5-AF, 1,5-anhydro-D-fructose; DMSO, dimethyl sulfoxide; PBS, phosphate-buffered saline; Rot, rotenone.

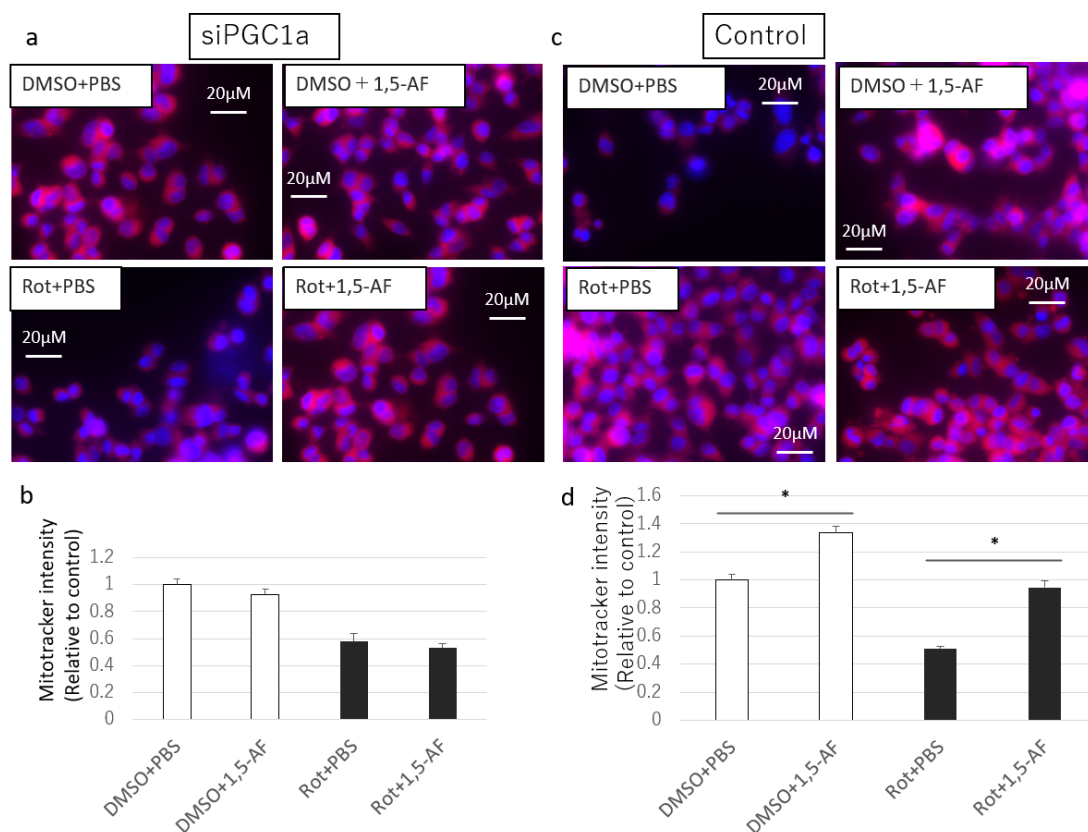

**Supplementary Figure S4.** Effects of PGC-1 $\alpha$  silencing on the mitochondrial protective activity of 1,5-AF against rotenone treatment in cultured PC12 cells. **(a)** Representative confocal images of MitoTracker staining in cells transfected with *PPARGC1A* small interfering RNA (siRNA; magnification: 100 $\times$ ; scale bar: 20  $\mu$ m). **(b)** Transfection with *PPARGC1A* siRNA inhibited the increase in MitoTracker intensity of 1,5-AF treatment in rotenone-treated cells. **(c)** Representative confocal images of MitoTracker staining in cells transfected with control siRNA (magnification: 100 $\times$ ; scale bar: 20  $\mu$ m). **(d)** In cells transfected with control siRNA, treatment with 1,5-AF increased the MitoTracker intensity in both DMSO- and rotenone-treated cells. All data are expressed as the mean  $\pm$  standard error of the mean. \* $p < 0.05$ . 1,5-AF, 1,5-anhydro-D-fructose; DMSO, dimethyl sulfoxide; PBS, phosphate-buffered saline; Rot, rotenone; siPGC1a, cells transfected with *PPARGC1A* siRNA.

R10uM 1h + stim 24h

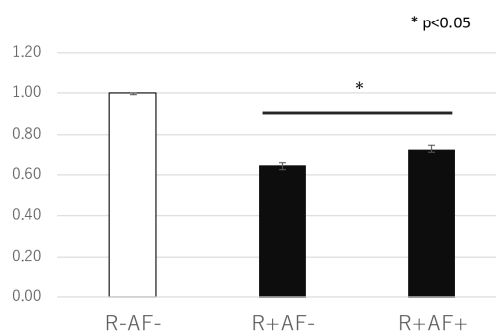

**Supplementary Figure S5.** Protective effects of 1,5-AF in PC12 cells exposed to rotenone prior to 1,5-AF treatment, evaluated using the MTT assay. Cells were cultured without rotenone (10  $\mu$ M) or 1,5-AF for 25 hours (R-AF-), with rotenone (10  $\mu$ M) for 1 hour and with rotenone-free media for 24 hours (R+AF-), or with rotenone (10  $\mu$ M) for 1 hour and with 1,5-AF (50  $\mu$ g/mL) in rotenone-free media for 24 hours. All data are expressed as the mean  $\pm$  standard error of the mean of triplicate experiments. \* $p$  < 0.05, \*\* $p$  < 0.01. 1,5-AF, 1,5-anhydro-D-fructose; R, rotenone; stim, stimulation.

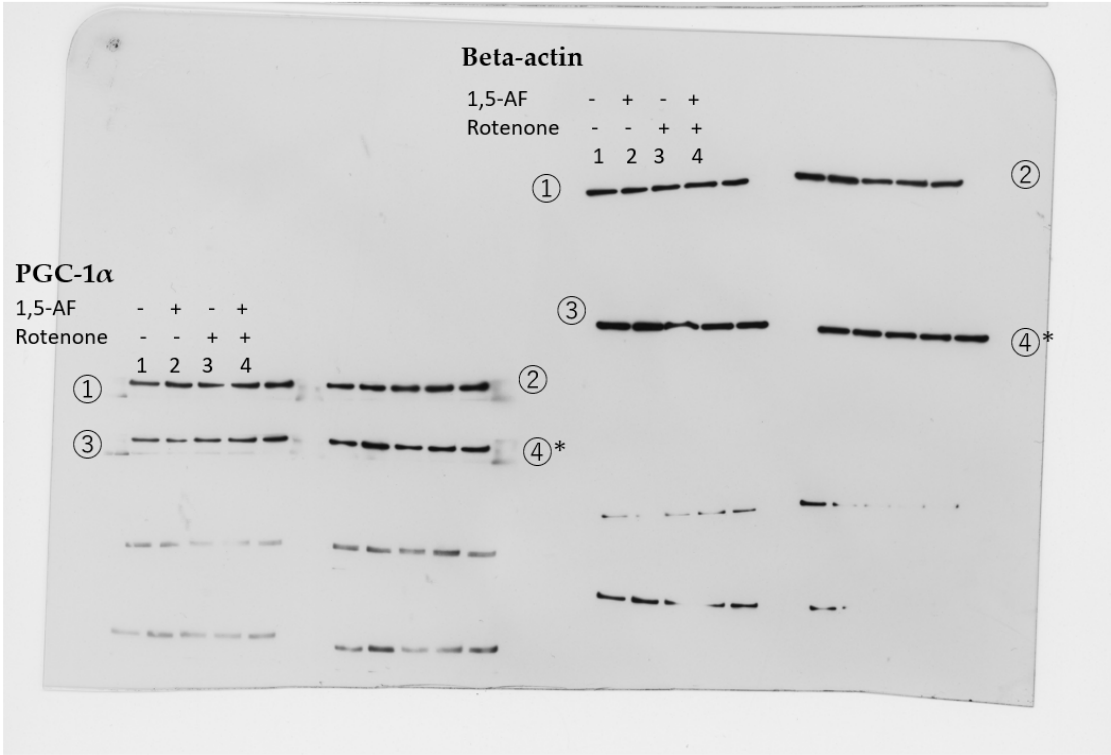

**Supplementary Figure S6.** Original scan data from Figure 5a. \*Denotes the blot used in the figure. PGC-1 $\alpha$ , peroxisome proliferator-activated receptor- $\gamma$  coactivator 1 $\alpha$ ; 1,5-AF, 1,5-anhydro-D-fructose.

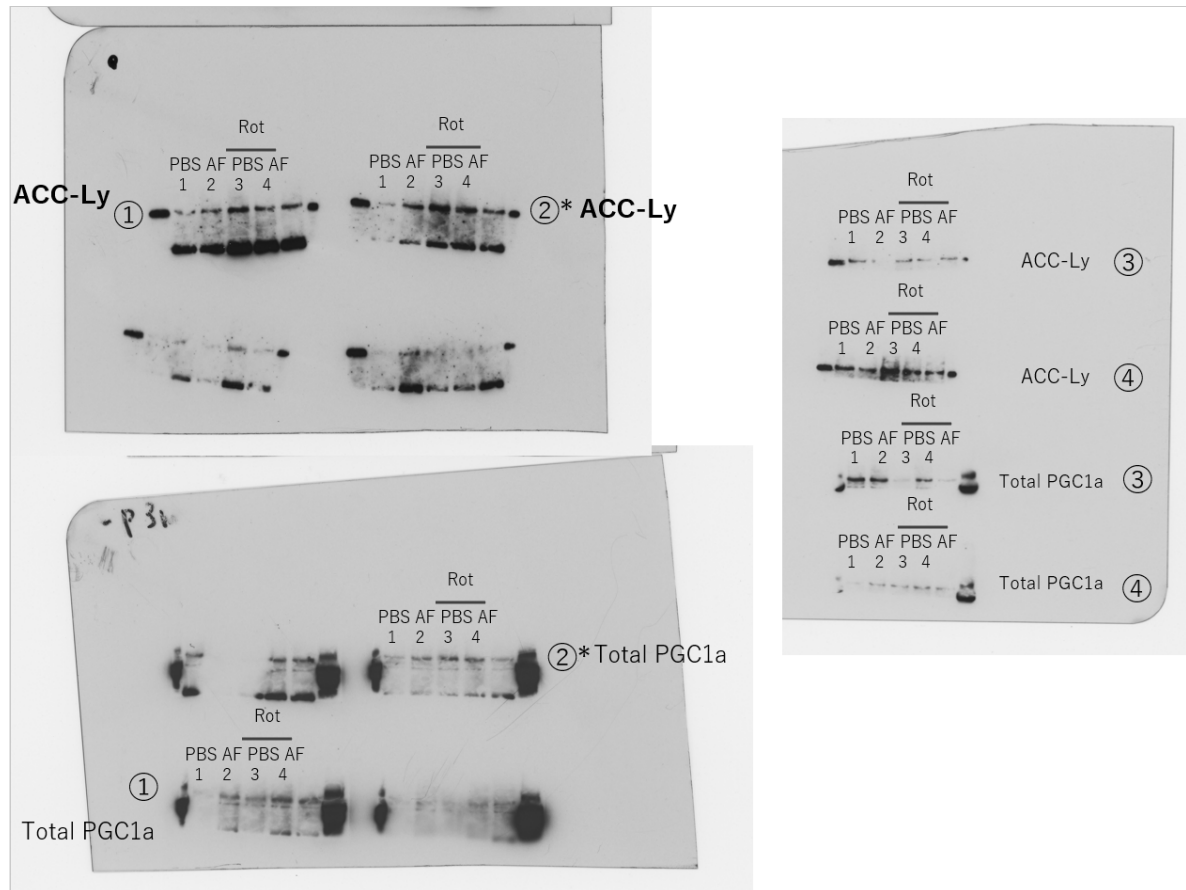

**Supplementary Figure S7.** Original scan data from Figure 5b. \*Denotes the blot used in the figure. AF, 1,5-anhydro-D-fructose; Rot, rotenone; PBS, phosphate-buffered saline; ACC-Ly, acetylated lysine; PGC-1 $\alpha$ , peroxisome proliferator-activated receptor- $\gamma$  coactivator 1 $\alpha$ .

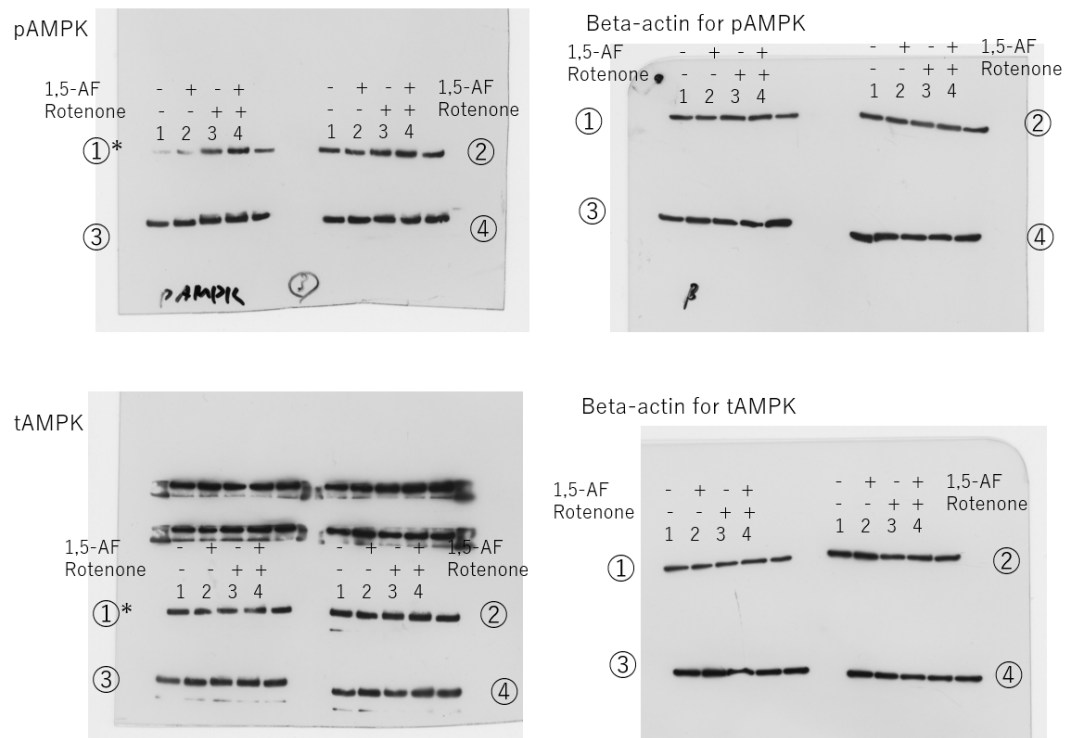

**Supplementary Figure S8.** Original scan data from Figure 5c. \*Denotes the blot used in the figure. 1,5-AF, 1,5-anhydro-D-fructose; pAMPK, phosphorylated AMP-activated protein kinase; tAMPK, total AMP-activated protein kinase.
